# Supplementary figures and images for: Robustness and evolvability in natural chemical resistance: identification of novel systems properties, biochemical mechanisms and regulatory interactions
Source: Royal Society of Chemistry journal article supplement (doi:10.1039/c002567b), 2010-06-02

## SCPnet robustness to attack and failure

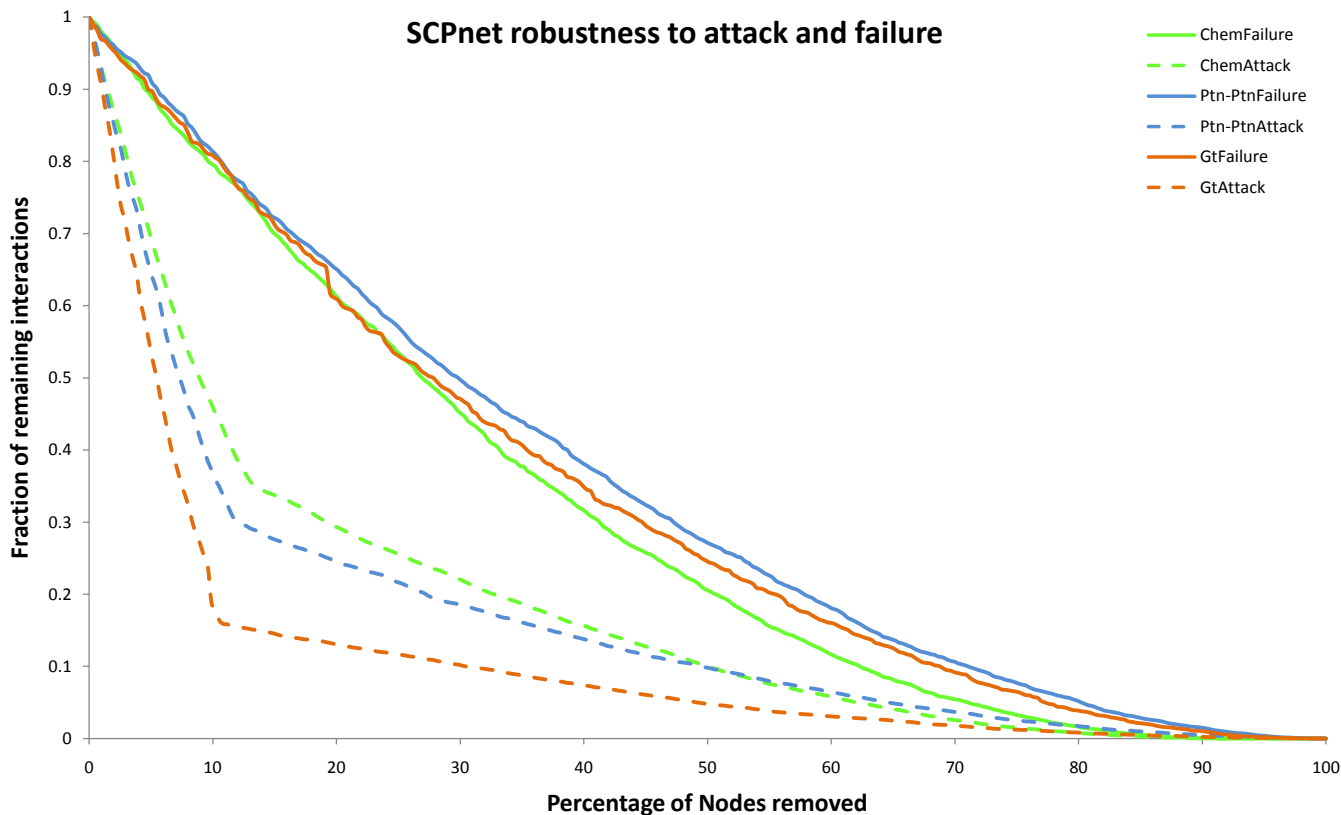

Supplement: c002567b_3.pdf [file c002567b_3.pdf]
